# Supplementary material
Source: PubMed Central journal article supplement (PMC3147475)
Supplement: supp_77_15_5110__1.pdf [file supp_77_15_5110__1.pdf]

SUPPLEMENTAL TABLE 1. BLAST comparison of putative protein-coding genes of strains Fx1, U112, and 3523

| Strain | 3523 (1854 CDS) |    |     | Fx1 (1819 CDS) |    |     | U112 (1821 CDS) |    |     |
|--------|-----------------|----|-----|----------------|----|-----|-----------------|----|-----|
|        | BBH             | UH | NH  | BBH            | UH | NH  | BBH             | UH | NH  |
| 3523   | -               | -  | -   | 1623           | 55 | 176 | 1616            | 59 | 179 |
| Fx1    | 1623            | 51 | 145 | -              | -  | -   | 1672            | 48 | 99  |
| U112   | 1616            | 75 | 130 | 1672           | 55 | 94  | -               | -  | -   |

CDS: protein-coding sequences

BBH: (bidirectional best hits) indicates highly similar genes, most likely orthologs

UH: (unidirectional hits) indicates less similar genes, or gene fragments

NH: (no hits) indicates genes without a significant match in the other strain

| SUPPLEMENTAL TABLE 2. Comparison of the <i>wbt</i> gene clusters of strains Schu S4, 3523, Fx1, and U112 |                                      |                                     |                                     |                                                                                           |
|----------------------------------------------------------------------------------------------------------|--------------------------------------|-------------------------------------|-------------------------------------|-------------------------------------------------------------------------------------------|
| <i>F. tularensis</i> strain                                                                              | <i>F. novicida</i> -like strain 3523 | <i>F. novicida</i> -like strain Fx1 | <i>F. novicida</i> strain U112      | Annotation                                                                                |
| Schu S4                                                                                                  | Locus tag                            | Locus tag                           | Locus tag                           |                                                                                           |
| Locus tag<br>(protein)                                                                                   | (protein, % identity <sup>1</sup> )  | (protein, % identity <sup>1</sup> ) | (protein, % identity <sup>1</sup> ) |                                                                                           |
| FTT_1447c (494 aa)                                                                                       | FN3523_1475 (495 aa, 88%)            | FNFX1_1451 (494 aa, 96%)            | FTN_1417 (494 aa, 99%)              | ManB:<br>Phosphomannomutase                                                               |
| FTT_1448c (468 aa)                                                                                       | FN3523_1476 (468 aa, 95%)            | FNFX1_1452 (468 aa, 97%)            | FTN_1418 (468 aa, 97%)              | ManC: Mannose-1-<br>phosphate<br>guanylyltransferase/<br>mannose-6-phosphate<br>isomerase |
| ISFtu1/IS630 (126 aa) <sup>2</sup>                                                                       | None                                 | None                                | None                                | Transposase                                                                               |
| FTT_1450c (348 aa)                                                                                       | FN3523_1477 (333 aa, 94%)            | FNFX1_1453 (339 aa, 98%)            | FTN_1420c (85 aa) <sup>2</sup>      | WbtM:<br>dTDP-D-glucose 4,6-<br>dehydratase                                               |

|                    |                           |                          |                                     |                                                  |
|--------------------|---------------------------|--------------------------|-------------------------------------|--------------------------------------------------|
| None               | None                      | None                     | ISFtu3/IS1016 (233 aa) <sup>2</sup> | Transposase                                      |
| None               | None                      | FNFX1_1454 (121 aa)      | None                                | Hypothetical protein                             |
| FTT_1451c (294 aa) | FN3523_1478 (293 aa, 96%) | FNFX1_1455 (299 aa, 97%) | None                                | WbtL: Glucose-1-phosphate<br>thymidyltransferase |
| None               | FN3523_1479 (417 aa)      | FNFX1_1456 (413 aa, 38%) | FTN_1420 (415 aa, 45%)              | WzxE: O antigen<br>flippase                      |
| FTT_1452c (286 aa) | None                      | None                     | None                                | WbtK:<br>Glycosyltransferase                     |
| FTT_1453c (495 aa) | None                      | None                     | None                                | WzxE: O-antigen<br>flippase <sup>3</sup>         |
| FTT_1454c (241 aa) | None                      | None                     | None                                | WbtJ: Hypothetical<br>protein                    |
| FTT_1455c (360 aa) | None                      | None                     | None                                | WbtI: Sugar transamine/<br>perosamine synthetase |
| None               | FN3523_1480 (505 aa)      | None                     | None                                | Aminotransferase                                 |

|                    |                           |                     |                        |                                          |
|--------------------|---------------------------|---------------------|------------------------|------------------------------------------|
| None               | FN3523_1481 (84 aa)       | None                | None                   | Hypothetical protein                     |
| None               | FN3523_1482 (402 aa)      | None                | None                   | Hypothetical protein                     |
| None               | FN3523_1483 (132 aa)      | None                | None                   | WblP protein                             |
| None               | FN3523_1484 (353 aa)      | None                | None                   | Hypothetical protein                     |
| None               | None                      | FNFX1_1457 (294 aa) | None                   | Acyltransferase 3                        |
| None               | None                      | FNFX1_1458 (370 aa) | None                   | TDP-4-oxo-6-deoxy-D-glucose transaminase |
| None               | None                      | FNFX1_1459 (188 aa) | None                   | O-acetyltransferase                      |
| None               | None                      | FNFX1_1460 (422 aa) | None                   | Glycosyl transferase, group 1            |
| FTT_1456c (628 aa) | FN3523_1485 (621 aa, 68%) | None                | FTN_1421 (630 aa, 98%) | WbtH: Glutamine amidotransferase         |
| None               | FN3523_1486 (389 aa)      | None                | None                   | UDP-glucose 6-dehydrogenase              |
| None               | FN3523_1487 (378 aa)      | None                | None                   | Glycosyl transferase, group 1            |

|      |                      |                          |                   |                                            |
|------|----------------------|--------------------------|-------------------|--------------------------------------------|
| None | FN3523_1488 (325 aa) | FNFX1_1461 (332 aa, 65%) | None              | Hypothetical protein                       |
| None | FN3523_1489 (369 aa) | FNFX1_1462 (369 aa, 96%) | None              | UDP-N-acetylglucosamine<br>2-epimerase     |
| None | FN3523_1490 (364 aa) | FNFX1_1463 (364 aa, 96%) | None              | NAD-dependent<br>epimerase/<br>dehydratase |
| None | FN3523_1491 (331 aa) | FNFX1_1464 (334 aa, 96%) | None              | Putative epimerase/<br>dehydratase         |
| None | FN3523_1492 (403 aa) | None                     | None              | Glycosyltransferase                        |
| None | FN3523_1493 (343 aa) | None                     | None              | Conserved hypothetical<br>protein          |
| None | FN3523_1494 (319 aa) | None                     | None              | Aminotransferase                           |
| None | None                 | None                     | FTN_1422 (370 aa) | WbtN: Glycosyl<br>transferase,<br>group 1  |

|                    |      |                     |                        |                                             |
|--------------------|------|---------------------|------------------------|---------------------------------------------|
| FTT_1457c (366 aa) | None | None                | FTN_1423 (362 aa, 90%) | WbtG: Glycosyl transferase, group 1         |
| None               | None | None                | FTN_1424 (430 aa)      | Hypothetical protein                        |
| FTT_1458c (409 aa) | None | None                | None                   | Membrane protein/O-antigen protein          |
| FTT_1459c (323 aa) | None | None                | FTN_1425 (324 aa, 99%) | WbtF: NAD dependent epimerase               |
| FTT_1460c (436 aa) | None | None                | FTN_1426 (436 aa, 99%) | WbtE: UDP-glucose/GDP-mannose dehydrogenase |
| FTT_1461c (363 aa) | None | None                | FTN_1427 (363 aa, 87%) | WbtD: Glycosyl transferase, group 1         |
| None               | None | None                | FTN_1428 (203 aa)      | WbtO: Acyltransferase                       |
| None               | None | FNFX1_1465 (407 aa) | None                   | Glycosyl transferase, group 1               |

|                                    |                           |                          |                        |                                    |
|------------------------------------|---------------------------|--------------------------|------------------------|------------------------------------|
| FTT_1462c (263 aa)                 | None                      | FNFX1_1466 (263 aa, 95%) | None                   | WbtC: UDP-glucose 4-epimerase      |
| FTT_1463c (205 aa)                 | None                      | FNFX1_1467 (143 aa, 99%) | None                   | WbtB: Galactosyl transferase       |
| None                               | FN3523_1495 (366 aa)      | None                     | FTN_1429 (209 aa, 76%) | WbtP: Galactosyl transferase       |
| None                               | FN3523_1496 (371 aa)      | None                     | FTN_1430 (371 aa, 93%) | WbtQ: Aminotransferase             |
| FTT_1464c (578 aa)                 | FN3523_1497 (581 aa, 92%) | FNFX1_1468 (522 aa, 98%) | FTN_1431 (578 aa, 99%) | WbtA: dTDP-glucose 4,6-dehydratase |
| ISFtu1/IS630 (126 aa) <sup>2</sup> | None                      | None                     | None                   | Transposase                        |

<sup>1</sup>Identity percentages to protein in column 1 or 2, when present

<sup>2</sup>These features are not annotated in the published genomes of strains Schu S4 and U112

<sup>3</sup>FTT\_1453c has 20% identity to FNFX1\_1456 but is unrelated to FN3523\_1479 and FTN\_1420 at the amino acid level

| SUPPLEMENTAL TABLE 3. Comparison of the <i>psl</i> gene clusters of strains 3523, Fx1, and Schu S4 |                                                                                                   |                                                                                                   |                             |
|----------------------------------------------------------------------------------------------------|---------------------------------------------------------------------------------------------------|---------------------------------------------------------------------------------------------------|-----------------------------|
| <i>F. novicida</i> -like strain<br>3523<br>Locus tag (protein)                                     | <i>F. novicida</i> -like strain Fx1 <sup>1</sup><br>Locus tag (protein, % identity <sup>3</sup> ) | <i>F. tularensis</i> strain Schu S4 <sup>2</sup><br>Locus tag (protein, % identity <sup>3</sup> ) | Annotation                  |
| None                                                                                               | FNFX1_1255 (315 aa)                                                                               | None                                                                                              | Transposase                 |
| FN3523_1275 (220 aa)                                                                               | FNFX1_1256 (220 aa, 95%)                                                                          | FTT_0800 (220 aa, 95%)                                                                            | HAD family hydrolase        |
| FN3523_1276 (337 aa)                                                                               | FNFX1_1257 (337 aa, 91%)                                                                          | FTT_0799 (337 aa, 92%)                                                                            | Glycosyltransferase         |
| FN3523_1277 (330 aa)                                                                               | FNFX1_1258 (335 aa, 90%)                                                                          | FTT_0798 (335 aa, 90%)                                                                            | Glycosyltransferase         |
| None                                                                                               | FNFX1_1259 (318 aa)                                                                               | FTT_0797 (319 aa, 97%)                                                                            | Glycosyltransferase         |
| FN3523_1278 (269 aa)                                                                               | None                                                                                              | None                                                                                              | Glycosyltransferase         |
| FN3523_1279 (319 aa)                                                                               | None                                                                                              | None                                                                                              | GDP-L-fucose synthetase     |
| FN3523_1280 (372 aa)                                                                               | None                                                                                              | None                                                                                              | GDP-mannose-4,6-dehydratase |
| FN3523_1281 (413 aa)                                                                               | None                                                                                              | None                                                                                              | Glycosyltransferase         |
| FN3523_1282 (275 aa)                                                                               | None                                                                                              | None                                                                                              | Methyltransferase           |
| FN3523_1283 (243 aa)                                                                               | None                                                                                              | None                                                                                              | Methyltransferase           |
| FN3523_1284 (300 aa)                                                                               | None                                                                                              | None                                                                                              | Sugar transferase           |



|                      |                          |                        |                                             |
|----------------------|--------------------------|------------------------|---------------------------------------------|
| FN3523_1285 (387 aa) | None                     | None                   | UDP-glucose 6-dehydrogenase                 |
| FN3523_1286 (217 aa) | None                     | None                   | Hypothetical protein                        |
| FN3523_1287 (273 aa) | None                     | None                   | Methyltransferase                           |
| FN3523_1288 (432 aa) | None                     | None                   | Polysaccharide biosynthesis protein         |
| None                 | FNFX1_1260 (386 aa)      | None                   | KpsC: Capsule polysaccharide export protein |
| None                 | FNFX1_1261 (247 aa)      | None                   | Hypothetical protein                        |
| None                 | None                     | FTT_0796 (253 aa)      | Conserved hypothetical protein              |
| None                 | None                     | FTT_0795 (227 aa)      | Methyltransferase domain family             |
| None                 | None                     | FTT_0794 (428 aa)      | Conserved hypothetical protein              |
| None                 | FNFX1_1262 (562 aa)      | FTT_0793 (560 aa, 97%) | ABC transporter ATP-binding protein         |
| FN3523_1289 (371 aa) | FNFX1_1263 (423 aa, 79%) | FTT_0792 (409 aa, 84)  | WejK: Glycosyltransferase                   |
| FN3523_1290 (339 aa) | FNFX1_1264 (339 aa, 95%) | FTT_0791 (339 aa, 82%) | GalE: UDP-glucose 4-epimerase               |
| FN3523_1291 (417 aa) | FNFX1_1265 (417 aa, 90%) | FTT_0790 (464 aa, 90%) | Sugar transferase                           |

<sup>1</sup>The *psl* gene clusters of strains Fx1 and U112 have identical chromosomal arrangements

<sup>2</sup>The *psl* gene clusters in *F. tularensis* strains Schu S4, WY96-3418, and FSC198 have identical chromosomal arrangements

<sup>3</sup>Identity percentages to protein in column 1 or 2, when present
